# Supplementary material for: Driving force of metallo (Mg–H and Mg–Cl)-ene reaction mechanisms
Source: Royal Society of Chemistry journal article supplement (doi:10.1039/b925166a), 2010-01-01
Supplement: b925166a.pdf [file b925166a.pdf]

Allyl-MgH

|    |           |           |           |
|----|-----------|-----------|-----------|
| C  | 0.000000  | 0.000000  | 0.000000  |
| C  | 0.000000  | 0.000000  | 1.343800  |
| C  | 1.204393  | 0.000000  | 2.239589  |
| Mg | 1.634516  | 2.034801  | 2.811251  |
| H  | -0.915971 | 0.026347  | -0.562649 |
| H  | 0.914538  | -0.046953 | -0.568391 |
| H  | -0.958214 | 0.037462  | 1.843000  |
| H  | 1.034759  | -0.633839 | 3.106717  |
| H  | 2.070552  | -0.401704 | 1.716038  |
| X  | 0.855065  | 2.351429  | 2.270694  |
| H  | 1.952555  | 3.685308  | 3.198493  |

Allyl-MgCl

|    |           |           |           |
|----|-----------|-----------|-----------|
| C  | 0.000000  | 0.000000  | 0.000000  |
| C  | 0.000000  | 0.000000  | 1.342800  |
| C  | 1.210529  | 0.000000  | 2.230956  |
| Mg | 1.623453  | 1.986363  | 2.929137  |
| H  | -0.916625 | 0.018458  | -0.561514 |
| H  | 0.914584  | -0.034531 | -0.568639 |
| H  | -0.955200 | 0.026099  | 1.846959  |
| H  | 1.065444  | -0.665431 | 3.078268  |
| H  | 2.085973  | -0.354419 | 1.691038  |
| X  | 0.834905  | 2.329633  | 2.418885  |
| Cl | 2.030478  | 4.061973  | 3.600388  |

MgH-Comp

|    |           |           |           |
|----|-----------|-----------|-----------|
| C  | 0.037148  | 0.005096  | -0.008127 |
| C  | 0.014115  | 0.005443  | 1.335915  |
| C  | 1.194331  | -0.002409 | 2.257656  |
| Mg | 1.602267  | 1.952514  | 3.104232  |
| H  | 1.877250  | 3.219893  | 4.256100  |
| H  | 0.961359  | -0.050284 | -0.560239 |
| H  | -0.868724 | 0.030011  | -0.588015 |
| H  | -0.955446 | 0.040110  | 1.813998  |
| H  | 1.025580  | -0.708572 | 3.069820  |
| H  | 2.084024  | -0.343344 | 1.727862  |
| C  | 1.233971  | 3.699728  | 0.747535  |
| C  | 2.516632  | 3.313313  | 0.635048  |
| H  | 0.441918  | 3.146903  | 0.274828  |
| H  | 2.790932  | 2.445353  | 0.061946  |
| H  | 0.962838  | 4.589141  | 1.288417  |
| H  | 3.316187  | 3.882899  | 1.075576  |

MgCl-Comp

|    |           |           |           |
|----|-----------|-----------|-----------|
| C  | 0.188189  | -0.030926 | -0.050306 |
| C  | 0.044355  | 0.056559  | 1.283094  |
| C  | 1.134648  | -0.000578 | 2.308835  |
| Mg | 1.685613  | 1.954943  | 3.023208  |
| Cl | 2.214771  | 3.505100  | 4.555799  |
| H  | 1.148555  | -0.204917 | -0.507867 |
| H  | -0.655906 | 0.035093  | -0.713818 |
| H  | -0.954989 | 0.208906  | 1.666720  |
| H  | 0.824760  | -0.612741 | 3.153507  |
| H  | 2.025048  | -0.469687 | 1.891003  |
| C  | 1.260302  | 3.706280  | 0.869175  |
| C  | 2.541492  | 3.316860  | 0.730743  |
| H  | 0.463551  | 3.183118  | 0.370784  |
| H  | 2.804999  | 2.477613  | 0.110894  |
| H  | 1.001068  | 4.574813  | 1.448551  |
| H  | 3.346101  | 3.864764  | 1.189078  |

MgH-TS1

|    |           |           |           |
|----|-----------|-----------|-----------|
| C  | 0.000000  | 0.000000  | 0.000000  |
| C  | 0.000000  | 0.000000  | 1.439800  |
| C  | 1.244037  | 0.000000  | 2.251273  |
| Mg | 2.109289  | 1.995207  | 2.456435  |
| H  | -0.972549 | -0.175802 | -0.434733 |
| H  | 0.738613  | -0.654042 | -0.442840 |
| H  | -0.888231 | 0.383754  | 1.921816  |
| H  | 1.041569  | -0.345717 | 3.263252  |
| H  | 1.993598  | -0.666120 | 1.827607  |
| X  | 1.569061  | 2.144323  | 3.284637  |
| H  | 2.758405  | 3.576232  | 2.704502  |
| C  | 0.482161  | 1.613610  | -0.650302 |
| C  | 0.363995  | 1.682743  | -2.077551 |
| H  | -0.157910 | 2.310929  | -0.127141 |
| H  | -0.585598 | 1.911819  | -2.528264 |
| X  | 1.453847  | 1.395565  | -0.741312 |
| H  | 1.507133  | 1.690122  | -0.303047 |
| H  | 1.068925  | 1.161955  | -2.701927 |

MgCl-TS1

|    |           |           |           |
|----|-----------|-----------|-----------|
| C  | 0.000000  | 0.000000  | 0.000000  |
| C  | 0.000000  | 0.000000  | 1.438800  |
| C  | 1.241578  | 0.000000  | 2.248002  |
| Mg | 2.110942  | 1.989006  | 2.438013  |
| H  | -0.970223 | -0.186562 | -0.434206 |
| H  | 0.747797  | -0.641451 | -0.445103 |
| H  | -0.889592 | 0.373625  | 1.924012  |
| H  | 1.048006  | -0.332035 | 3.264573  |
| H  | 2.000591  | -0.653678 | 1.825382  |
| X  | 1.571664  | 2.145671  | 3.265440  |
| Cl | 2.945879  | 4.026155  | 2.747797  |
| C  | 0.457845  | 1.626285  | -0.648530 |
| C  | 0.332183  | 1.693611  | -2.073617 |
| H  | -0.190259 | 2.312667  | -0.120816 |
| H  | -0.619478 | 1.918972  | -2.520873 |
| X  | 1.429753  | 1.411327  | -0.744386 |
| H  | 1.484058  | 1.716376  | -0.306678 |
| H  | 1.044365  | 1.189448  | -2.702872 |

MgH-Int

|    |           |           |           |
|----|-----------|-----------|-----------|
| C  | 0.000000  | 0.000000  | 0.000000  |
| C  | 0.000000  | 0.000000  | 1.484500  |
| C  | 1.260843  | 0.000000  | 2.270552  |
| Mg | 2.178890  | 1.979495  | 2.378722  |
| H  | -0.990141 | -0.220844 | -0.382543 |
| H  | 0.681586  | -0.749684 | -0.390352 |
| H  | -0.866344 | 0.440486  | 1.957538  |
| H  | 1.071823  | -0.304676 | 3.298199  |
| H  | 1.983604  | -0.701168 | 1.856206  |
| X  | 1.660020  | 2.174656  | 3.211000  |
| H  | 2.853229  | 3.563910  | 2.520820  |
| C  | 0.455147  | 1.423726  | -0.641112 |
| C  | 0.350622  | 1.455505  | -2.114868 |
| H  | -0.158163 | 2.200826  | -0.195098 |
| H  | -0.595109 | 1.684097  | -2.573871 |
| X  | 1.425072  | 1.191779  | -0.714904 |
| H  | 1.488087  | 1.589804  | -0.338832 |
| H  | 1.025266  | 0.857150  | -2.702629 |

MgCl-Int

|    |           |           |           |
|----|-----------|-----------|-----------|
| C  | 0.000000  | 0.000000  | 0.000000  |
| C  | 0.000000  | 0.000000  | 1.484500  |
| C  | 1.253399  | 0.000000  | 2.270762  |
| Mg | 2.175523  | 1.979066  | 2.369910  |
| H  | -0.984712 | -0.246046 | -0.380035 |
| H  | 0.699519  | -0.732363 | -0.390956 |
| H  | -0.872108 | 0.422760  | 1.961277  |
| H  | 1.073249  | -0.288138 | 3.302647  |
| H  | 1.991062  | -0.684049 | 1.858531  |
| X  | 1.654964  | 2.180042  | 3.199745  |
| Cl | 3.026165  | 4.027995  | 2.537348  |
| C  | 0.415389  | 1.435554  | -0.637915 |
| C  | 0.310620  | 1.465316  | -2.111596 |
| H  | -0.218717 | 2.195483  | -0.191638 |
| H  | -0.637519 | 1.679360  | -2.571942 |
| X  | 1.388698  | 1.218175  | -0.711501 |
| H  | 1.444086  | 1.631838  | -0.337113 |
| H  | 1.002022  | 0.888305  | -2.700674 |

MgH-TS2

|    |           |           |           |
|----|-----------|-----------|-----------|
| C  | 0.000000  | 0.000000  | 0.000000  |
| C  | 0.000000  | 0.000000  | 1.479600  |
| C  | 1.273113  | 0.000000  | 2.241147  |
| Mg | 2.377876  | 1.884258  | 2.052232  |
| H  | -0.895896 | -0.466195 | -0.393538 |
| H  | 0.848077  | -0.557916 | -0.380199 |
| H  | -0.855654 | 0.457714  | 1.955274  |
| H  | 1.097822  | -0.155156 | 3.303358  |
| H  | 1.933312  | -0.796650 | 1.903036  |
| X  | 1.899135  | 2.245191  | 2.852566  |
| H  | 3.217093  | 3.393318  | 1.967367  |
| C  | 0.049386  | 1.520747  | -0.651087 |
| C  | 1.126549  | 1.700922  | -1.644275 |
| H  | -0.922275 | 1.687648  | -1.101004 |
| H  | 1.106179  | 1.124800  | -2.552933 |
| X  | 0.480097  | 2.202911  | -0.060206 |
| H  | 0.143295  | 2.242398  | 0.155822  |
| H  | 2.094756  | 2.064915  | -1.343891 |



MgCl-TS2

|    |           |           |           |
|----|-----------|-----------|-----------|
| C  | 0.000000  | 0.000000  | 0.000000  |
| C  | 0.000000  | 0.000000  | 1.480700  |
| C  | 1.266048  | 0.000000  | 2.239059  |
| Mg | 2.383329  | 1.876506  | 1.995309  |
| H  | -0.869546 | -0.512742 | -0.394196 |
| H  | 0.875917  | -0.514148 | -0.379070 |
| H  | -0.860676 | 0.441437  | 1.960636  |
| H  | 1.106308  | -0.125054 | 3.305332  |
| H  | 1.939931  | -0.783990 | 1.904485  |
| X  | 1.909116  | 2.261691  | 2.786988  |
| Cl | 3.456716  | 3.817184  | 1.799180  |
| C  | -0.029995 | 1.519610  | -0.638308 |
| C  | 0.993339  | 1.740333  | -1.680795 |
| H  | -1.027859 | 1.658092  | -1.037947 |
| H  | 0.967325  | 1.151359  | -2.580552 |
| X  | 0.388861  | 2.232736  | -0.076158 |
| H  | 0.080643  | 2.242893  | 0.165687  |
| H  | 1.938277  | 2.195524  | -1.439310 |

MgH-TS

|    |           |           |           |
|----|-----------|-----------|-----------|
| C  | 0.000000  | 0.000000  | 0.000000  |
| C  | 0.000000  | 0.000000  | 1.388400  |
| C  | 1.144778  | 0.000000  | 2.203995  |
| Mg | 2.003913  | 2.150537  | 2.201075  |
| H  | 2.993747  | 3.044808  | 3.326809  |
| H  | 0.876977  | -0.359970 | -0.512400 |
| H  | -0.928808 | -0.165105 | -0.518149 |
| H  | -0.945001 | 0.187820  | 1.877237  |
| H  | 0.999608  | -0.159517 | 3.263565  |
| H  | 2.026259  | -0.494871 | 1.815429  |
| C  | 0.246356  | 2.124029  | -0.538771 |
| C  | 1.179427  | 2.890403  | 0.180200  |
| H  | 0.504183  | 1.766834  | -1.517828 |
| H  | 2.127720  | 3.092172  | -0.299265 |
| H  | -0.799932 | 2.326329  | -0.406039 |
| H  | 0.781542  | 3.743325  | 0.719245  |

MgCl-TS

|    |           |           |           |
|----|-----------|-----------|-----------|
| C  | 0.000000  | 0.000000  | 0.000000  |
| C  | 0.000000  | 0.000000  | 1.388000  |
| C  | 1.146748  | 0.000000  | 2.204621  |
| Mg | 1.939286  | 2.145219  | 2.125644  |
| Cl | 3.210743  | 3.301942  | 3.574400  |
| H  | 0.880930  | -0.347969 | -0.513699 |
| H  | -0.927336 | -0.171461 | -0.517889 |
| H  | -0.945496 | 0.181499  | 1.877602  |
| H  | 1.002691  | -0.156246 | 3.264015  |
| H  | 2.028329  | -0.493776 | 1.815727  |
| C  | 0.202892  | 2.132354  | -0.553329 |
| C  | 1.127435  | 2.931173  | 0.144553  |
| H  | 0.459855  | 1.765026  | -1.528418 |
| H  | 2.064793  | 3.145288  | -0.349707 |
| H  | -0.845975 | 2.312031  | -0.410415 |
| H  | 0.715746  | 3.784071  | 0.671730  |

MgH-Products

|    |           |           |           |
|----|-----------|-----------|-----------|
| C  | 0.000000  | 0.000000  | 0.000000  |
| C  | 0.000000  | 0.000000  | 1.505600  |
| C  | 1.089751  | 0.000000  | 2.295126  |
| Mg | 0.615498  | 2.820613  | 1.780124  |
| H  | 1.045705  | 3.439233  | 3.343515  |
| H  | 1.019487  | -0.064437 | -0.370689 |
| H  | -0.524119 | -0.887728 | -0.346885 |
| H  | -0.972387 | -0.007130 | 1.977571  |
| H  | 1.012674  | -0.028835 | 3.367172  |
| H  | 2.084254  | -0.035594 | 1.881184  |
| C  | -0.689114 | 1.273220  | -0.600384 |
| C  | 0.071470  | 2.573829  | -0.300653 |
| H  | -0.795652 | 1.108460  | -1.672071 |
| H  | 0.991432  | 2.586578  | -0.890885 |
| H  | -1.702160 | 1.325814  | -0.202913 |
| H  | -0.511128 | 3.420981  | -0.661101 |

MgCl-Products

|    |           |           |           |
|----|-----------|-----------|-----------|
| C  | 0.000000  | 0.000000  | 0.000000  |
| C  | 0.000000  | 0.000000  | 1.506000  |
| C  | 1.091479  | 0.000000  | 2.295527  |
| Mg | 0.660200  | 2.709934  | 1.785140  |
| Cl | 1.195861  | 3.496330  | 3.812346  |
| H  | 1.017719  | -0.086306 | -0.370809 |
| H  | -0.543905 | -0.875416 | -0.346148 |
| H  | -0.971705 | -0.002605 | 1.979650  |
| H  | 1.015784  | -0.028196 | 3.367588  |
| H  | 2.084942  | -0.048878 | 1.879405  |
| C  | -0.662659 | 1.289462  | -0.599420 |
| C  | 0.118448  | 2.575574  | -0.290567 |
| H  | -0.763088 | 1.132352  | -1.672033 |
| H  | 1.033299  | 2.590786  | -0.886071 |
| H  | -1.676798 | 1.359338  | -0.208552 |
| H  | -0.457028 | 3.439821  | -0.615936 |
